# Supplementary material for: Inclusive Climate Action: A Scoping Review on the Representation and Inclusion of People with Intellectual Disability in Climate Change Research
Source: Research Square preprint supplement (doi:10.21203/rs.3.rs-4015326/v1), 2024-03-12
Supplement: Supplementary file 1 [file 7364f7f80e856b86878e3ca4.xlsx]

## Sheet: review_298938_20230508130407
Study ID	Title	Authors	Country	Year	Journal	Aim of study	Population	Total number of participants (if applicable)	Data collection	Main findings	Themes/categories	Limitations	Practice implications
Takahashi 1997	The effect of the disaster caused by the great Hanshin earthquake on people with intellectual disability	Takahashi, A. Watanabe, K. Oshima, M. Shimada, H. Ozawa, A.	Japan	1997	Journal of Intellectual Disability Research	To understand major crisis support systems for people with intellectual disability during an earthquake	People with intellectual disability	N/A	Document analysis	Difficulties in refuges, e.g. rejection/segregation, unequal access to food and other resources. Difficulties confirming the safety of people with intellectual disability (required good relationships with neighbours, or between families and support services).	Disaster response		Importance of confirming the safety of people with intellectual disability after a disaster - need for an accessible register.
Self 2007	A virtual approach to teaching safety skills to children with autism spectrum disorder	Self, T. Scudder, R. R. Weheba, G. Crumrine, D.	USA	2007	Topics in Language Disorders	To determine the benefits of using VR in comparison with a more traditional integrated/visual treatment model for teaching safety skills	People with autism	8 children (6 - 12 years)	control (N=4) vs. intervention (N=4) trial, baseline vs after training measures of safety skills	Visually structured learning environments are helpful for children with autism (e.g. picture cues, comic strip conversations, social stories). VR taps into this visually enhanced learning - enhanced visual details, concrete organisation, ability to modify activities to encourage generalization. In this study, both the control and the VR strategies to teach fire and tornado drills were deemed succ…	Disaster preparedness
Valenti 2012	Adaptive response of children and adolescents with autism to the 2009 earthquake in L'Aquila, Italy	Valenti, M. Ciprietti, T. Egidio, C. D. Gabrielli, M. Masedu, F. Tomassini, A. R. Sorge, G.	Italy	2012	Journal of autism and developmental disorders	To evaluate the intermediate and long-term adaptive behaviour of people with autism 1 year after their exposure to a 2009 earthquake, compared to an unexposed peer group.	People with autism	18 (experienced earthquake), 42 (control group) - 43 out of 60 participants had an intellectual disability	Survey measuring adaptive behaviours (VABS completed by parents)	The earthquake destroyed the autism rehabilitation centre, and all families were forced to find provisional housing. Adaptive behaviour of children and young people with autism declined dramatically after the earthquake but did begin to improve by 12 months.	Disaster response	Doesn't consider impact on caregivers	Recovery depends on steadying of daily life routines and intensive rehabilitation programmes.
Stough 2015	World Report on Disability, Intellectual Disabilities, and Disaster Preparedness: Costa Rica as a Case Example	Stough, Laura	Costa Rica	2015	Journal of Policy & Practice in Intellectual Disabilities	To address points raised in the World Report on Disabilities that are related to the specific concerns of people with intellectual disability, and to illustrate how progressive policies can support people with intellectual disability affected by disaster or conflict though the example of Costa Rica.	People with intellectual disability	N/A	Summary/analysis of World Report on Disabilities, and Costa Rica policy	The specific needs of people with intellectual disability are not detailed in the World Report. It does state that people with disability experience disproportionate risks in disaster situations, and are often excluded from relief and rehabilitation processes. They have diverse and specific needs, which are often not met by disaster support services. In Costa Rica, people with intellectual disabi…	Disaster preparedness and response	Commentary only, lacks detailed examples of implications for people with intellectual disability.	Ineragency policy frameworks are vital
Fino 2017	Disaster awareness simulation for children with autism spectrum disorder using android virtual reality	Fino, Razor; Lin, Mark Jessel; Caballero, Arlene; Balahadia, Francis Fernandez	Philippines	2017	Journal of Telecommunication, Electronic and Computer Engineering	Design a disaster awareness VR simulation	People with autism	4?	Prototyping, evaluation survey	VR system acceptable to experts	Disaster preparedness	Only consulted professional "experts" in IT, psychology, and one carer. Deficit focus.	No indication if this software has been used or developed any further.
Edmonds 2017	Designing Emergency Preparedness Resources for Children with Autism	Edmonds, Casey Olivia	UK	2017	International Journal of Disability, Development and Education	To identify how emergency preparedness resources can be developed for children and teenagers with autism	People with autism; Other: Autism experts, academics and practitioners	Consultation with 3 autism experts during resource development, evaluation with 18 academics and practitioners	Resource co-design and evaluation survey	Lack of emergency preparedness resources for children with autism and other developmental disabilities. Author used successful resources already developed for primary aged children in Essex, UK, and adapted them using social stories techniques.	Disaster preparedness	No involvement of young people with autism in the design or evaluation	Need for resources globally
Shapiro 2020	Preparing Survivors of Traumatic Brain Injury for Catastrophic Hurricanes in the Time of Climate Change	Shapiro, Lauren T. Jimenez, Viviana Espinel, Zelde Galea, Sandro Kossin, James P. Shultz, James M.	USA	2020	Journal of Head Trauma Rehabilitation	highlight the unique challenges faced by individuals living with traumatic brain injury (TBI) before, during, and in the aftermath of major storms	Other: People with traumatic brain injury	N/A	Commentary	Disasters like hurricanes aggravate existing risks (e.g. PTSD, depression/anxiety); difficulty understanding warnings, disorientation, difficulty preparing their home, and/or evacuating. Offers tips to prepare, including the role that health care professionals can play before, during and after a storm.	Disaster preparedness and response		Patients should be encouraged to create a personal support network of at least 3 people in close proximity who would be ready and willing to assist in the event of an emergency. Have at least a 7-day supply of food, water, medications, batteries and any other health supplies. Prepare individual/family emergency plans.
Nagata 2020	Developing a disaster management education and training program for children with intellectual disabilities to improve â€œzest for lifeâ€ in the event of a disaster â€“ a case study on tochigi prefectural imaichi special school for the intellectually disabled	Nagata, T. Kimura, R.	Japan	2020	Journal of Disaster Research	Case study of earthquake disaster management education program's development, implementation and evaluation.	People with intellectual disability	51	Survey completed by students, measuring acquisition of knowledge and skills; mastering of skills (pre and post). Qualitative interviews with teachers.	Current disaster education invites passive engagement, not offering ways to act on their own initiative. This program designed to impart awareness so that learners can protect themselves from the effects of earthquake tremors without anyone else providing assistance. Delivered by teachers in Special Support Schools, without need for disaster management experts. The program improved knowledge.	Disaster preparedness	Earthquake specific - generalisable?	Important to empower people with intellectual disability to protect themselves
Pyke 2020	Planning for inclusion? An assessment of Ontario's emergency preparedness guide for people with disabilities	Pyke, C. Wilton, R.	Canada	2020	International Journal of Disaster Risk Reduction	To examine the planning and consultation process that informed the development of the emergency preparedness guide; to assess the extent to which the guide captures the needs and experiences of peopl with disability.	People with intellectual disability; People with autism; Health/social care professionals; Other: people with disability more generally	15 reps from government and disability organisations, 4 people with intellectual disability	Case study: scan of policy and planning documents, key-informant interviews.	People with intellectual disabilities and/or psychiatric/mental health issues largely absent from the guide, and no consultation from organisations representing people with intellectual disability in the process of its development. Format and usability of the guide inaccessible for this population. The guide was seen as valuable in that it helped raise awareness of the needs of people with disabi…	Disaster preparedness		Importance of involving people with intellectual disability in planning, policy and conversations about disasters (and CC?)
Manullang 2021	Improving students with intellectual disabilities science process skills through photosynthesis experiment in enhancing climate change awareness	Manullang, T. I. B. Nandiyanto, A. B. D. Suryadi, A. Rochyadi, E. Haerudin, D. Muspita, R. Sumiroh, E. Manullang, L. S.	Indonesia	2021	Journal of Engineering Science and Technology	Enhancing climate change awareness through photosynthesis experiments	People with intellectual disability	6	Demographic data, academic learning outcomes, and subject information (collected through interviews with students' teachers)	Challenging for students to learn about climate change at the same time as they were learning about photosynthesis.	Climate change education	Deficit focused.	Inquiry-based learning approach may be helpful for the students to learn through discovery, observation, trying and drawing conclusions, rather than teacher speaking only.
Seddighi 2021	Representation of disasters in school textbooks for children with intellectual disabilities in Iran: A qualitative content analysis	Seddighi, H. Sajjadi, H. Yousefzadeh, S. LÃ³pez LÃ³pez, M. Vameghi, M. Rafiey, H. Khankeh, H. R.	Iran	2021	International Journal of Disaster Risk Reduction	To investigate the representation of disasters in school textbooks for children with intellectual disability in the education system in Iran.	People with intellectual disability	N/A	Qualitative content analysis of school textbooks used in 2019-2020	Of 164 textbooks, 18 had content about hazards. Natural disasters are well covered in textbooks and use a variety of forms e.g. images, storytelling, notes. Lack of role models with disability, lack of cultural diversity (all characters from majority Persian ethnic group).	Disaster preparedness	Limited to Iranian textbooks.. Generalisable?
Sheehy 2022	Inclusive disaster risk reduction education for Indonesian children	Sheehy, K. Vackova, P. van Manen, S. Saragih Turnip, S. Rofiah, K. Twiner, A.	Indonesia	2022	International Journal of Inclusive Education	To understand Indonesian DRRE research and DRRE programmes that consider children with SEND and collect data regarding current materials, practices and needs	People with intellectual disability; Other: People with disability, teachers	769 Indonesian teachers	Literature review, questionnaire for Indonesian teachers	Children with special education needs and disability (SEND) entirely absent from systemic reviews on the topic of children and DDRE, and from recommendations for future research. 12 articles included DDRE programmes or guidance documents, only one of which considered children with SEND, however notion of inclusive pedagogy not considered. Results from the teacher survey suggest that DDRE programs…	Disaster preparedness	Only considered english language publications in literature review.	Need for guidance on how to develop and implement inclusive DRRE.
Barker 2022	The lived experience of sheltering for individuals with disabilities during severe tropical cyclones in northern Queensland, Australia	Barker, Ruth Malpass, Andrée West, Caryn	Australia	2022	International Journal of Disaster Risk Reduction	To gain the perspective of individuals with disabilities on the experience of sheltering during the three most recent severe tropical cyclones in northern Queensland, Australia	People with intellectual disability; people with autism; people with disability	12	qualitative, interpretive methodology: semi-structured interviews, inductive thematic analysis	Public cyclone shelters in northern QLD have no minimum requirements to ensure safety for people with disability. Overall, interviewed participants' experience of sheltering was influenced by a dynamic interaction between the physical and psychological impact of the cyclone (damage and physical changes to environment, as well as anxiety/trauma created by the experience e.g. cyclone warnings, disr…	Disaster preparedness and response	Mostly doesn't specifically identify experiences of people with autism and/or intellectual disability compared to people with other types of disability.	Use of social stories for psychological preparedness. The findings reinforce the importance of an individualised, person-centred risk reduction approach.
